# Supplementary material for: Furil-based ionic small molecules for green-emitting non-doped LECs with improved color purity
Source: Royal Society of Chemistry journal article supplement (doi:10.1039/d1nj00155h), 2021-01-01
Supplement: d1nj00155h1.pdf [file d1nj00155h1.pdf]

## Supporting Information

### **Furil based ionic small molecules for green emitting non-doped LECs with improved color purity**

*Jino C. John<sup>a</sup>, Kanagaraj Shanmugasundaram<sup>a</sup>, Puthenveedu Archana<sup>a</sup>, Regupathi Hariventhan<sup>a</sup>  
C. V. S. Brahmmananda Rao,<sup>b,c</sup> Gopinadhanpillai Gopakumar,<sup>b</sup> and Youngson Choe<sup>a\*</sup>*

a) School of Chemical and Biomolecular Engineering, Pusan National University, Busan 609-735, Republic of Korea.

b) Solution Chemistry & Mass Spectrometry Section, Fuel Chemistry Division, Indira Gandhi Centre for Atomic Research, Kalpakkam 603102, India.

c) Homi Bhabha National Institute, Indira Gandhi Centre for Atomic Research, Kalpakkam, 603102, India.

\* Corresponding author: Prof. Youngson Choe

Email: [choe@pusan.ac.kr](mailto:choe@pusan.ac.kr)

Tel.: +8251 510 2396;

Fax: +8251 512 8634.

### Table of contents

|                                                                                   |     |
|-----------------------------------------------------------------------------------|-----|
| The DFT optimized ground state geometry of the compound 1 .....                   | S1  |
| The DFT optimized ground state geometry of the compound 2 .....                   | S2  |
| Calculated molecular orbital amplitude plots of HOMO and LUMO of compound 1 ..... | S3  |
| Calculated molecular orbital amplitude plots of HOMO and LUMO of compound 2 ..... | S4  |
| PL intensity of FIBzPy and F1ThPy in thin films.....                              | S5  |
| Power efficiency vs luminance of device #1 and device #2 .....                    | S6  |
| Current efficiency vs luminance of device #1 and device #2 .....                  | S7  |
| External quantum efficiency vs luminance of device #1 and device #2 .....         | S8  |
| Current density vs voltage of device #1 and device #2 (repetitive run) .....      | S9  |
| Luminance vs voltage of device #1 and device #2 (repetitive run) .....            | S10 |

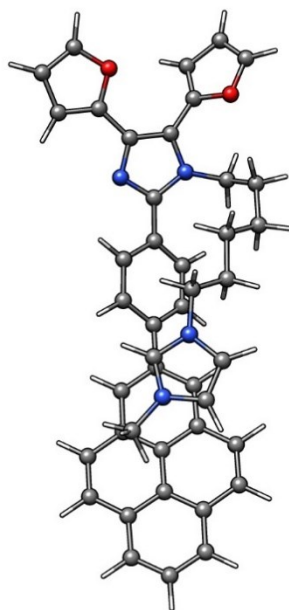

**Figure S1.** The DFT optimized ground state geometry of the FIBzPy.

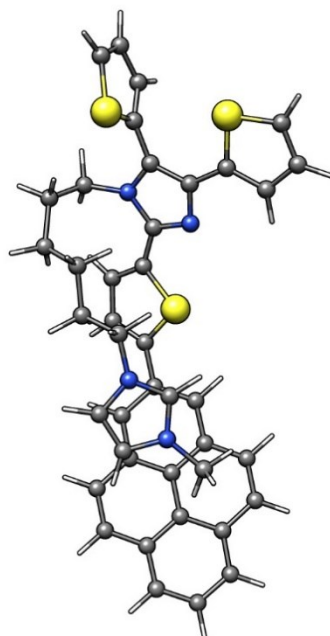

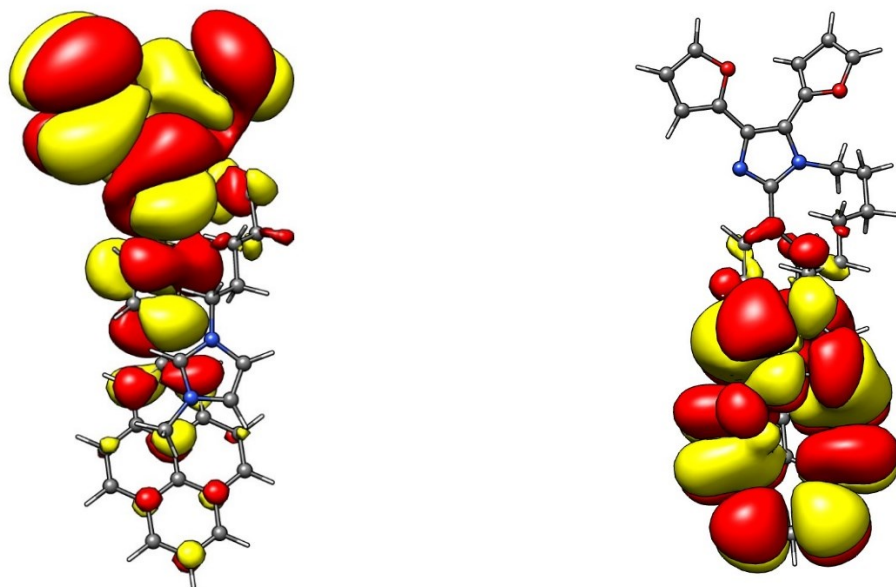

**Figure S3.** Calculated molecular orbital amplitude plots of HOMO and LUMO of FIBxPy calculated at B3LYP/def2-TZVP level.

**Figure S8.** The DFT optimized ground state geometry of the F1ThPy.

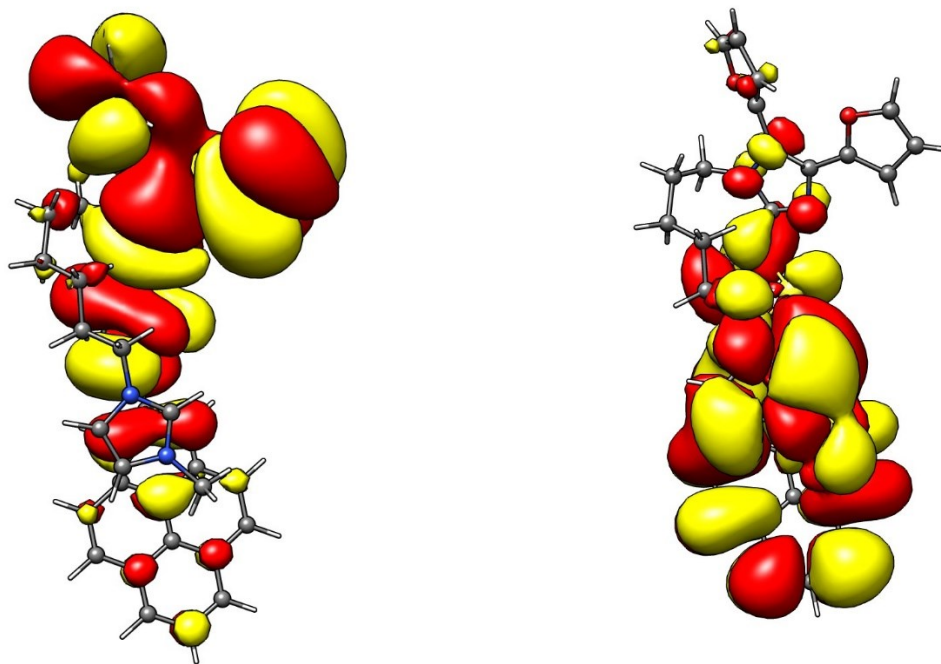

**Figure S4.** Calculated molecular orbital amplitude plots of HOMO and LUMO of F1ThPy calculated at B3LYP/def2-TZVP level.

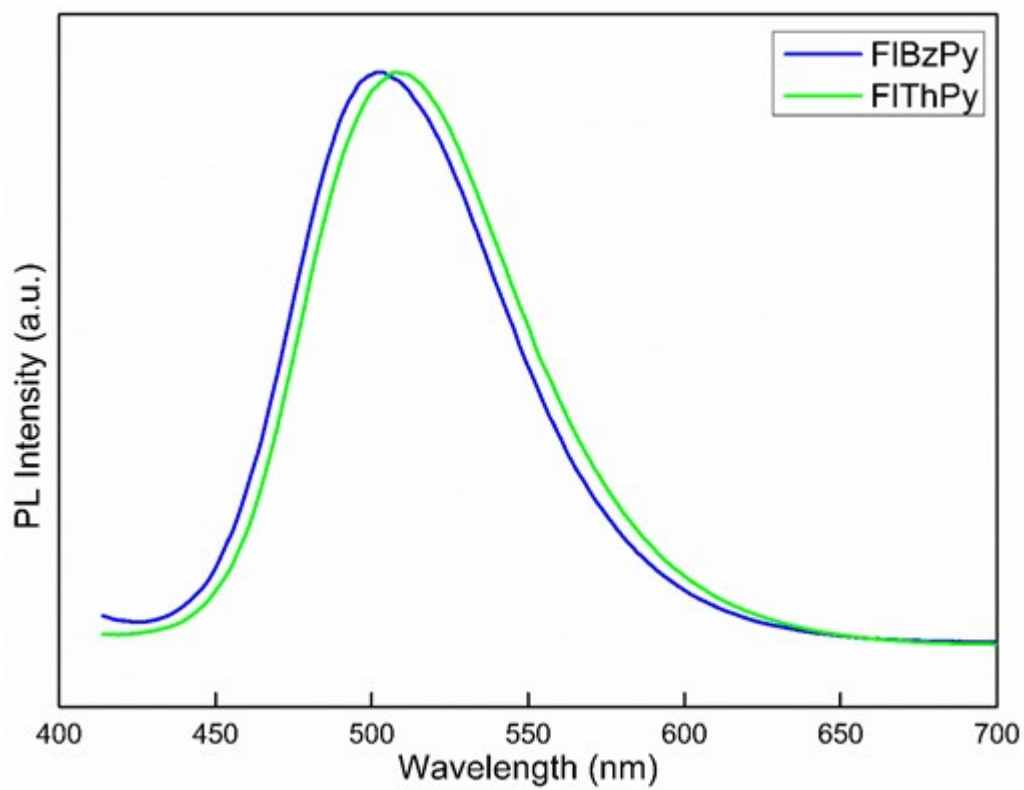

**Figure S5.** PL intensity of FIBzPy and FThPy in thin films

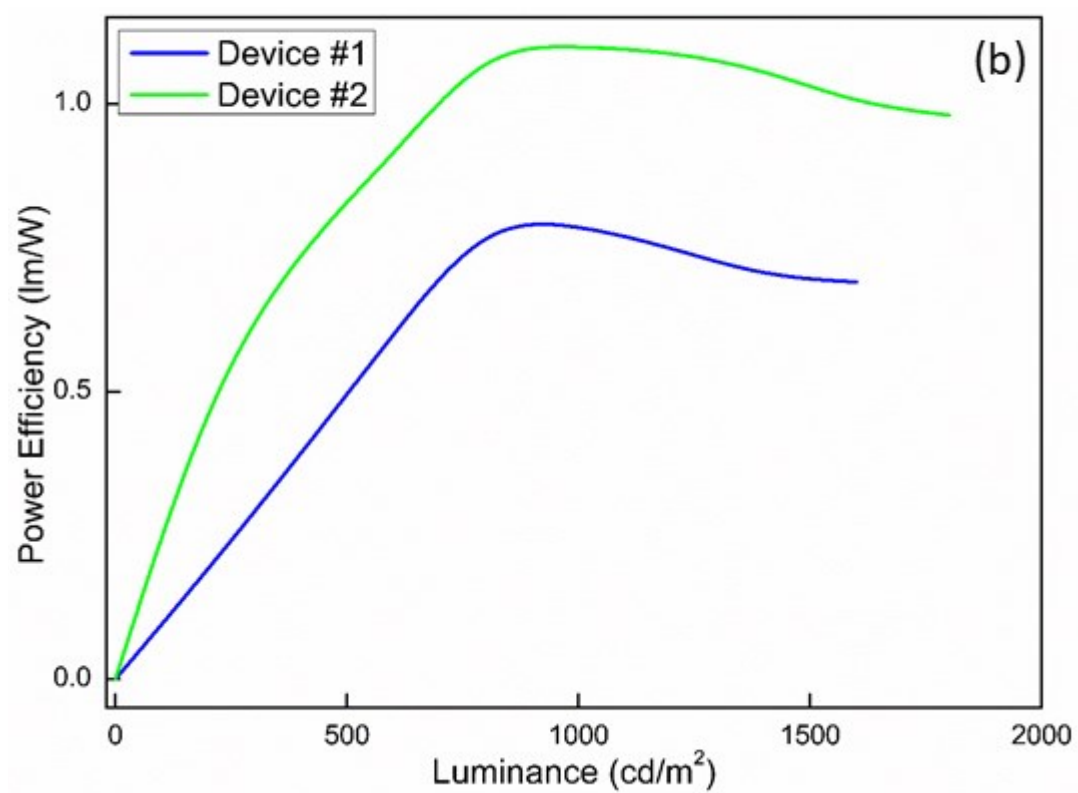

**Figure S6.** Power efficiency vs luminance of device #1 and device #2

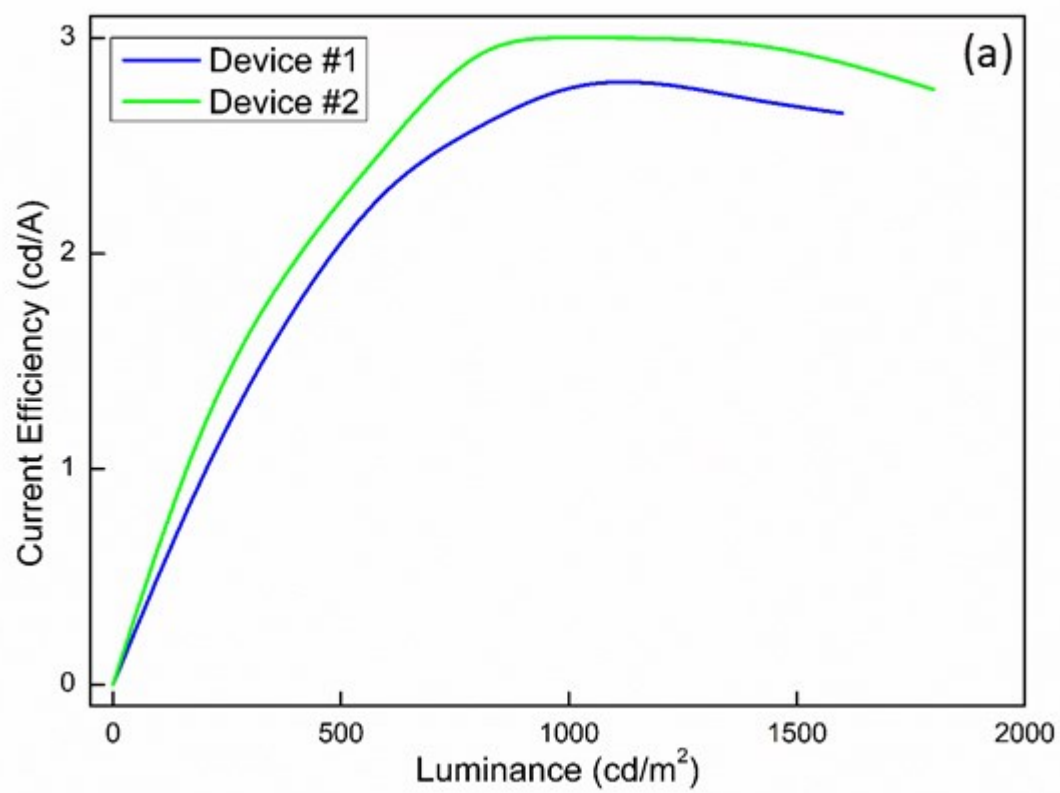

**Figure S7.** Current efficiency vs luminance of device #1 and device #2

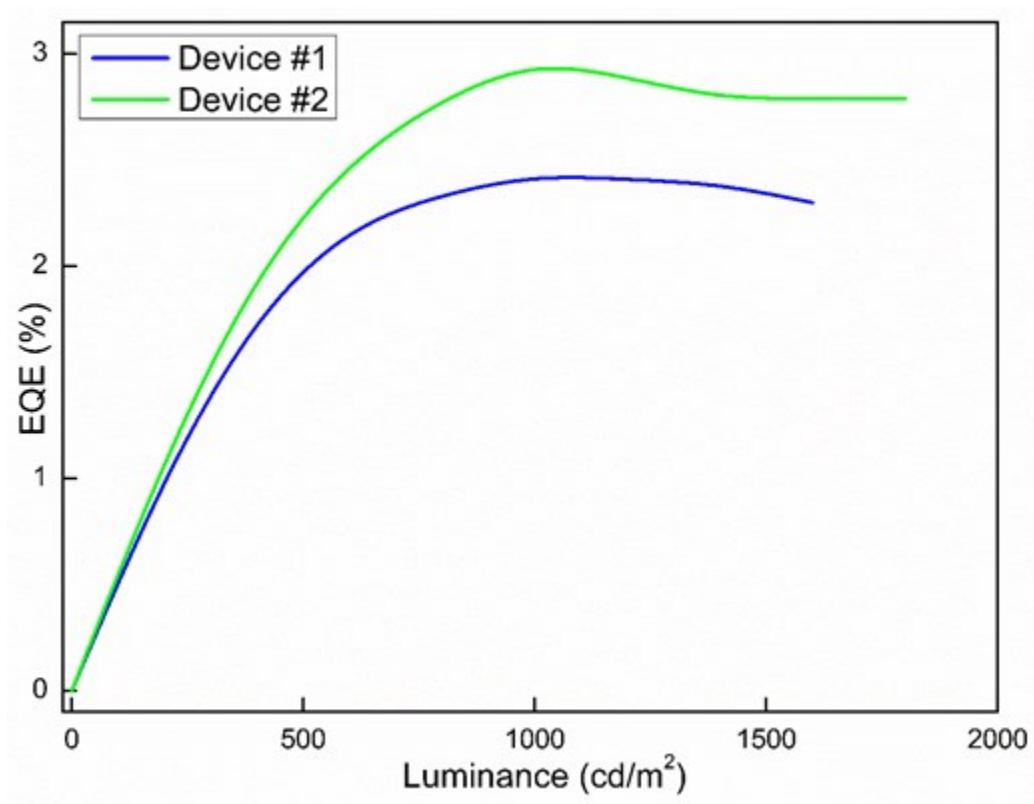

**Figure S8.** External quantum efficiency vs luminance of device #1 and device #2

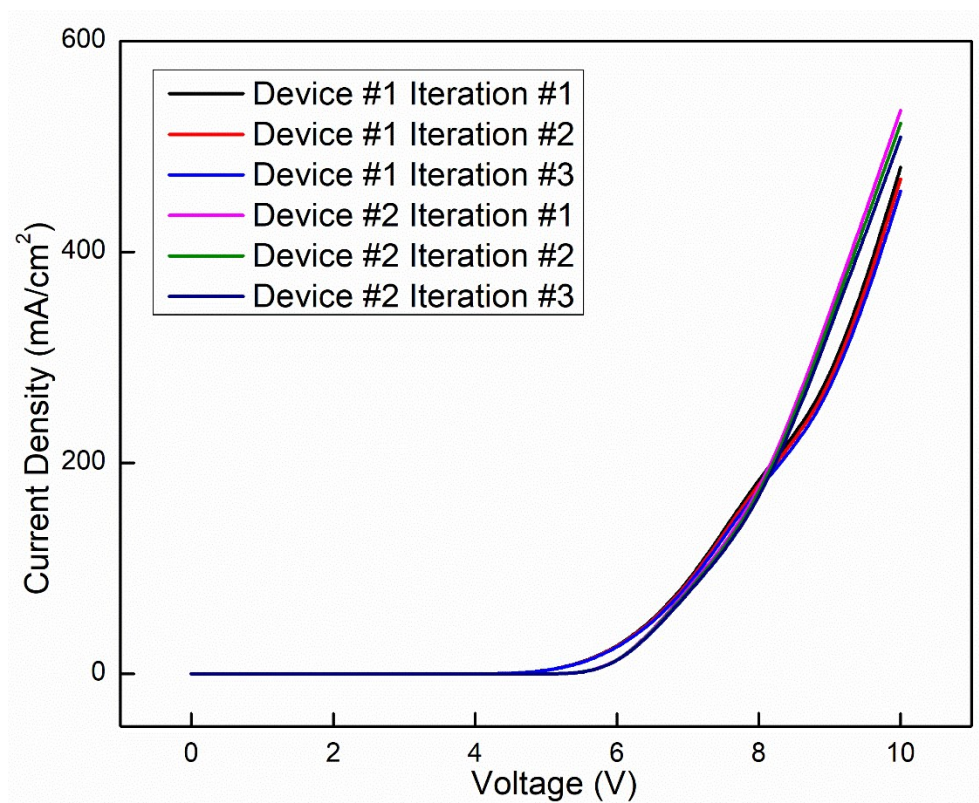

**Figure S9.** Current density vs voltage of device #1 and device #2 (repetitive run)

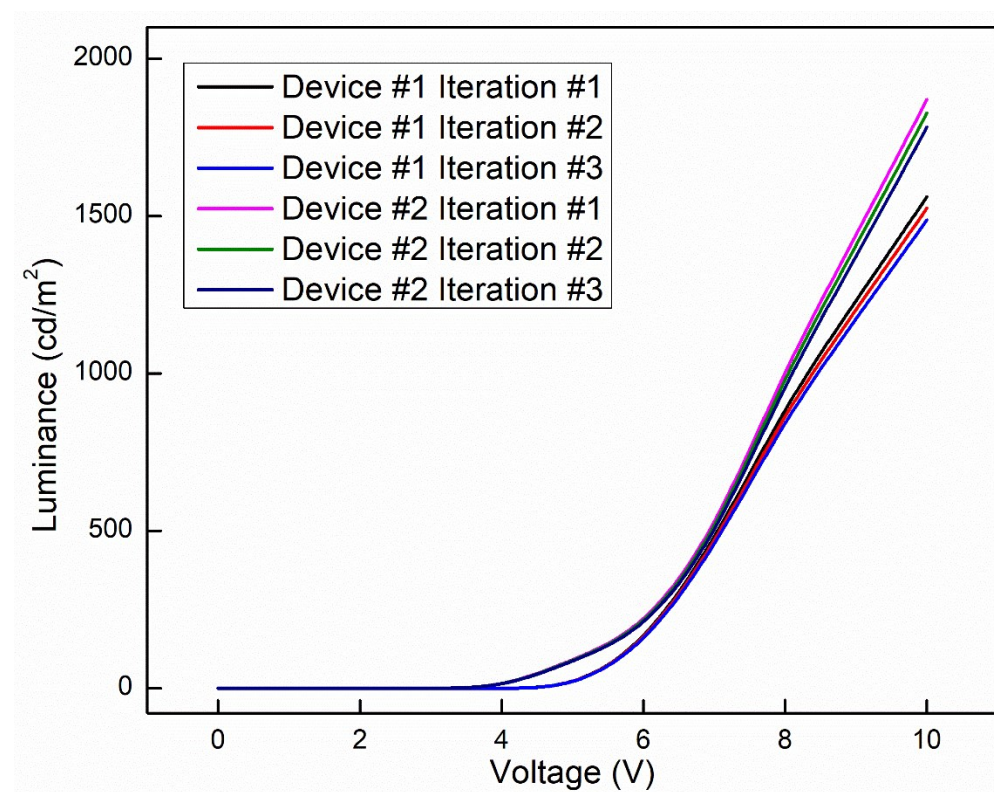

**Figure S10.** Luminance vs voltage of device #1 and device #2 (repetitive run)
